# Supplementary material
Source: Research Square preprint supplement (doi:10.21203/rs.3.rs-9550934/v1)
Supplement: Supplementary file 1 [file 68a682691d5d20da29ae05f4.docx]

Supplementary Information for

**Asymmetric Plant Polyphenol Linkers Enable Robust Metal–Organic Frameworks with Structural Heterogeneity**

Zijun Zhu,1 Tong Shao,1, Lantao He1, Jun Deng2, Yang Chu2, Xuemei Zhou2, Jiajing Zhou1,3, Shaojian Lin1, Jianwu Lan1, Jiaojiao Shang1,3,*

1 College of Biomass Science and Engineering, Sichuan University, Chengdu, Sichuan 610065, China

2 School of Chemical Engineering, Sichuan University, Chengdu, Sichuan 610065, China

3 National Engineering Laboratory for Clean Technology of Leather Manufacture, Sichuan University, Chengdu, Sichuan 610065, China

*Correspondence to: Email: jiaoj.shang@scu.edu.cn (J.S.)

**Contents**

[**1. Supplementary Figures** 3](#_Toc227916852)

[**2. Supplementary Tables** 23](#_Toc227916853)

[**3. Supplemental References** 27](#_Toc227916854)

**1. Supplementary Figures**


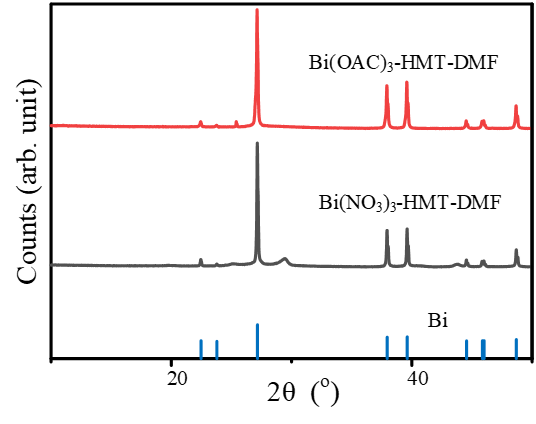


**Figure S1.** PXRD of products synthesized under the solvothermal conditions in DMF.

**Figure S2.** SEM and EDX patterns of products synthesized under the solvothermal conditions in DMF.

**Figure S3.** Coordination unit structure of SCU-1. O1, O2, and O3 are derived from HMT, O4 belongs to a water molecule, and O5 and O6 are coordinated oxygen.


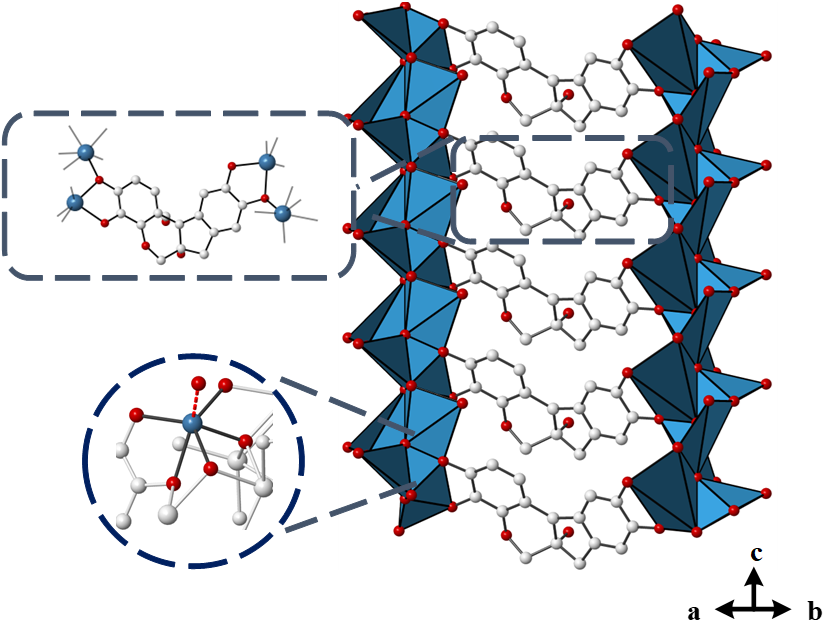


**Figure S4.** Chelation of HMT toward the bismuth oxo rods.


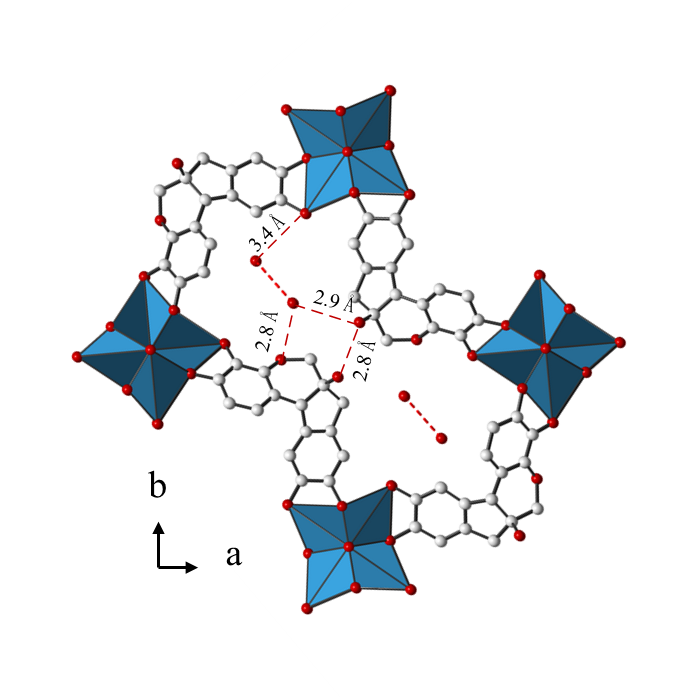


**Figure S5.** The observed hydrogen bond distances between the water molecules occupying the one-dimensional channels in SCU-1 and the hydroxyl oxygen and pyran oxygen of the HMT linker.


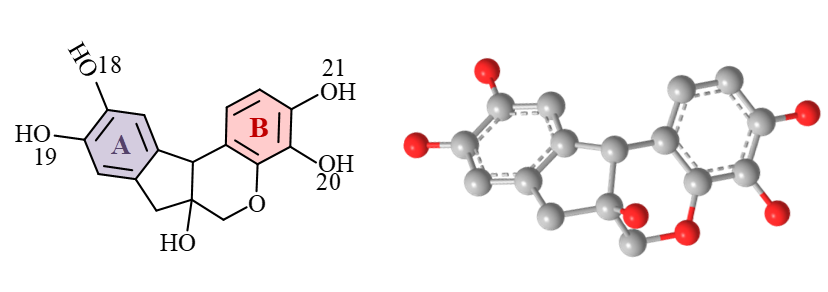


**Figure S6.** Structural formula of the HMT molecule and schematic diagram of the geometrically optimized molecular structure


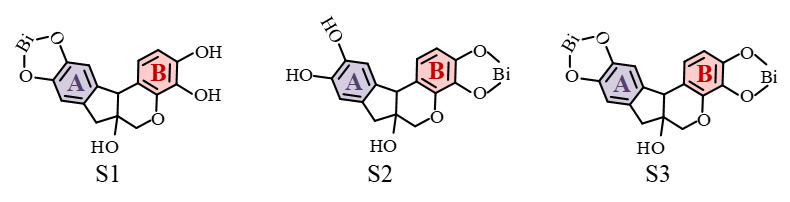


**Figure S7.** Proposed coordinated complexes of HMT and Bi3+ ions. Ring A and Ring B of HMT have different chemical environments.


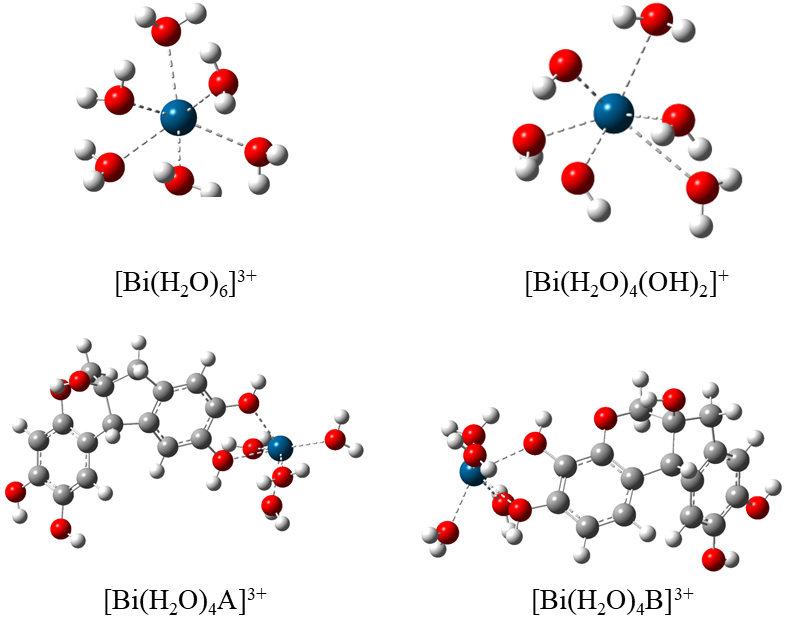


**Figure S8.** Optimized structure of different complexes


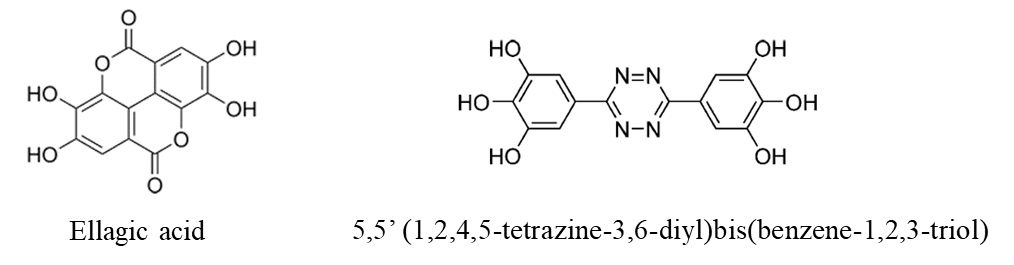


**Figure S9.** The structural formulas of ellagic acid and (1,2,4,5-tetrazine-3,6-diyl)bis(benzene-1,2,3-triol).


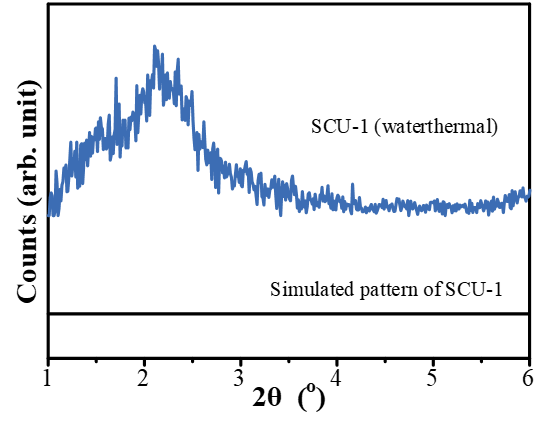


**Figure S10.** PXRD patterns of SCU-1 at the low 2θ region (1–6°).


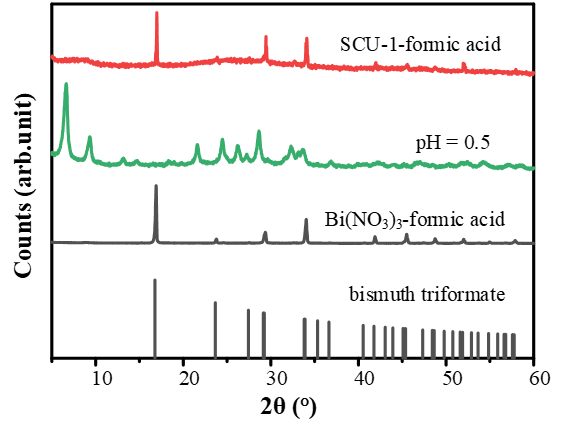


**Figure S11.** PXRD of: (1) SCU-1 stirred in formic acid, (2) sulfuric acid (at corresponding pH), (3) bismuth nitrate stirred in formic acid, and (4) the standard bismuthtris(formate) sample.

**Figure S12.** Cell viability of the B16 cell line after 24 h incubation with SCU-1, HMT, and bismuth acetate.

**Figure S13.** PXRD of SCU-1 after being stirred in aqueous solutions of L-cysteine and L-cystine, as well as patterns of the as-synthesized material and L-cystine for comparison.

**Figure S14.** Colloidal stability of SCU-1 in water (red) and RPMI (grey), representing ζ-potential evolution vs. time.

**Figure S15**. Ar adsorption-desorption isotherm of as-synthesized SCU-1, all recorded at liquid Ar temperature (87 K). The adsorption points are shown as solid symbols and the desorption points as hollow symbols. BET surface area 190 m2g-1.


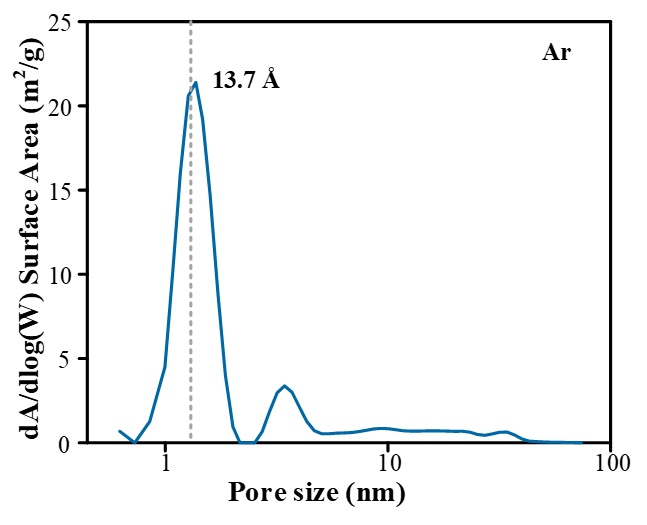


**Figure S16.** Pore size distribution as determined for SCU-1, using an Ar slit pore model. The dashed line is drawn at a pore-size value of 13.7 Å.


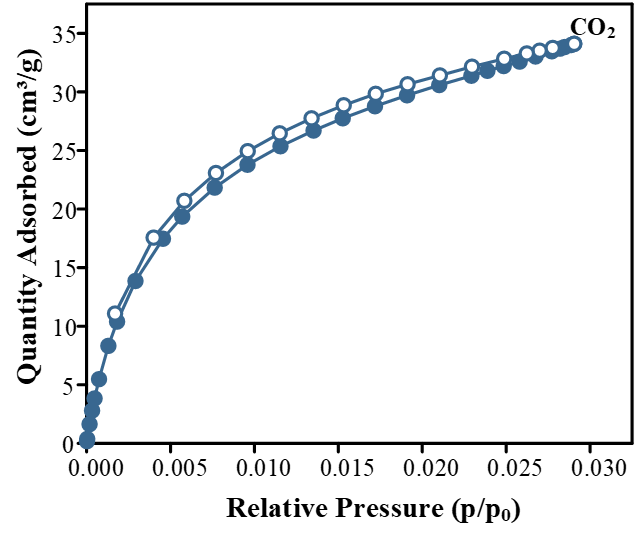


**Figure S17.** CO2 adsorption/desorption isotherms of SCU-1 at 0 °C


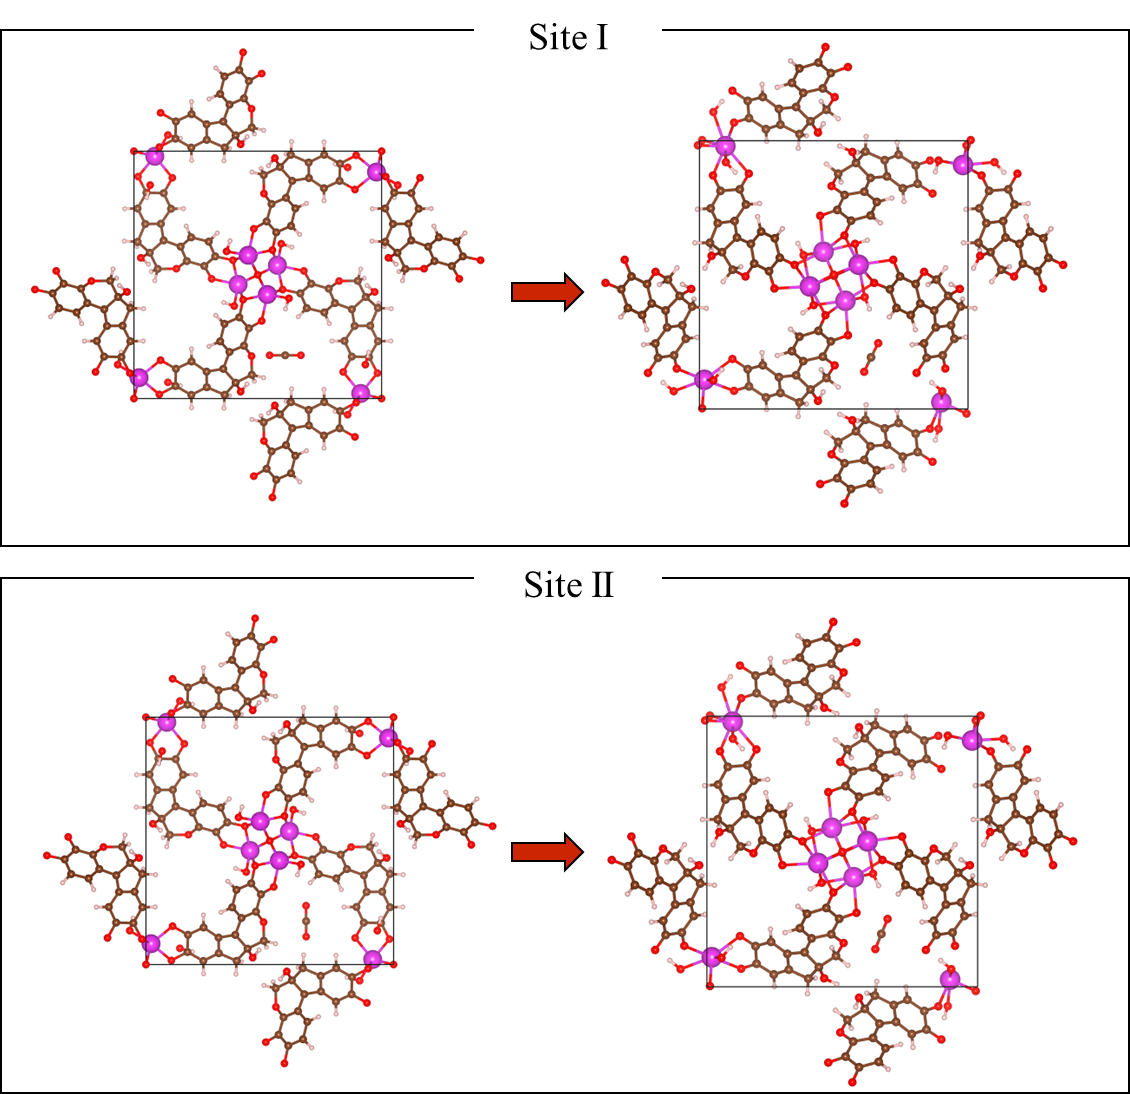


**Figure S18.** DFT-optimized structures of different CO2 adsorption sites. Color code: red, O; gray, C; purple, Bi; light gray, H

**Figure S19.** HPLC signals for liquid products formed in the CO2 reduction.

**Figure S20.** SEM and PXRD patterns of SCU-1 after 4 photocatalytic tests.

**2. Supplementary Tables**

**Table S1.** Crystallographic table for 3DED data of SCU-1.

| Specimen | SCU-1 |
| --- | --- |
| Crystal system | Tetragonal |
| Unit cell dimensions | a = 18.62  c = 5.54 |
| Volume (Å3) | 1924 Å3 |
| Z | 4 |
| Rotation range | 73.48° (–54.98° to 18.50°) |

**Table S2.** Crystallographic table for the structure refinement of SCU-1 against PXRD data.

| Identification code | SCU-1 |
| --- | --- |
| Crystal system | Tetragonal |
| Space group | P 42 (NO. 77) |
| Unit cell dimensions | a = 18.967 (19) Å  c = 5.666 (5) Å |
| Volume (Å3) | 2038.15 (500) Å3 |
| Wavelength | 1.54060 Å |
| Refinement method | Profile method |
| Refinement statistics | Rwp = 3.69 %  GOF = 2.24 |

**Table S3.** The condensed Fukui function and dual descriptor (based on Hirshfeld population analysis) for the catechol moiety in HMT.

| Different structures | condensed Fukui function | condensed dual descriptor |
| --- | --- | --- |
| O18 | 0.08642320 | -0.05579429 |
| O19 | 0.09422894 | -0.05761236 |
| O20 | 0.00844601 | -0.00387382 |
| O21 | 0.00479343 | -0.00106236 |

**Table S4. Summary of the photocatalytic CO2 reduction performance of Bi-based photocatalysts.**

| Catalysts | Reaction medium | light | Products (μmol g-1 h-1) | Refs. |
| --- | --- | --- | --- | --- |
| SCU-1 (this work) | H2O | Vis | C2H5OH: 50.13  CH3OH: 26.08  HCOOH: 6.46 | This work |
| BP/Bi2WO6 Heterojunction | Benzylamine | UV-vis | CO: 12.4  CH3OH: 8.6  C2H5OH: 61.3 | 1 |
| Bi19S27Cl3 | Na2SO3/Na2S/H2O | Vis | CO: 0.5  CH4: 0.4  CH3OH: 1.2 | 2 |
| RP-Bi2MoO6 | H2O | Vis | CH4: 11.3  HCOOH: 20.1  CH3OH: 31.2  C2H5OH: 51.8 | 3 |
| Bi4TaO8Cl/Bi | H2O | Vis | CH3OH: 2.3  C2H5OH: 5.1 | 4 |
| FAPbBr3/Bi2WO6 | Benzyl alcohol | Vis | CO: 170 | 5 |
| Bi2WO6-V | H2O | UV−vis | CO: 3.7  CH4: 9.95 | 6 |
| Bi2S3/TiO2/MoS2 | NaHCO3/HCl | UV-vis-NIR | CH3OH: 29.7  C2H5OH: 25.6 | 7 |
| Cu4Pd-BTO | H2O | 300 W Xe lamp | C2H5OH: 30.4 | 8 |
| Bi@Bi2MoO6 | NaHCO3 | Vis | CO: 0.85  CH3OH: 0.59  C2H5OH: 17.93 | 9 |

**3. Supplemental References**

1. Zhang, M. et al. Coupling benzylamine oxidation with CO2 photoconversion to ethanol over a black phosphorus and bismuth tungstate s‐scheme heterojunction. *Angew. Chem.* **135**, e202302919 (2023).

2. Das, K. et al. Intrinsic charge polarization in Bi19S27Cl3 nanorods promotes selective C-C coupling reaction during photoreduction of CO2 to ethanol. *Adv. Mater.* **35**, 2205994 (2023).

3. Das, R., Das, K., Ray, B., Vinod, C. P. & Peter, S. C. Green transformation of CO2 to ethanol using water and sunlight by the combined effect of naturally abundant red phosphorus and Bi2MoO6. *Energy Environ. Sci*. **15**, 1967–1976 (2022).

4. Songmei, Li. et al. Bi4TaO8Cl/Bi heterojunction enables high-selectivity photothermal catalytic conversion of CO2-H2O flow to liquid alcohol. *Chem. Eng. J.* **435**, 135133 (2022).

5. Huang, H. et al. Direct Z-scheme heterojunction of semicoherent FAPbBr3/Bi2WO6 interface for photoredox reaction with large driving force. *ACS Nano* **14**, 16689–16697 (2020).

6. Lu, C. et al. Constructing surface plasmon resonance on Bi2WO6 to boost high-selective CO2 reduction for methane. *ACS Nano* **15**, 3529–3539 (2021).

7. Alkanad, K. et al. Construction of Bi2S3/TiO2/MoS2 S-scheme heterostructure with a switchable charge migration pathway for selective CO2 reduction. *Sol. RRL* **5**, 2100501 (2021).

8. Cheng, T. et al. Tandem synergistic catalysis on Cu-Pd/Bi4Ti3O12 nanorods promoting highly selective photoconversion of CO2 to ethyl alcohol. *Inorg. Chem*. **64**, 5455–5462 (2025).

9. Zhao, D., Xuan, Y., Zhang, K. & Liu, X. Highly selective production of ethanol over hierarchical Bi@Bi2MoO6 composite via bicarbonate-assisted photocatalytic CO2 reduction. *ChemSusChem* **14**, 3293–3302 (2021).
